# Supplementary material
Source: publisher site journal article supplement (https://www.degruyterbrill.com/publication/isbn/9783050049687/downloadAsset/9783050049687_Buchinformation.pdf)
Supplement: Supplementary file 1 [file 9783050049687_Buchinformation.pdf]

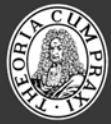

# Akademie Verlag

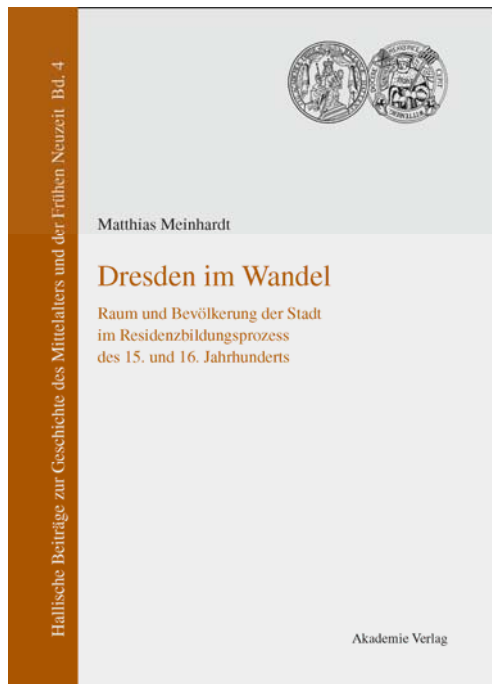

Matthias Meinhardt

## Dresden im Wandel

*Raum und Bevölkerung der Stadt im  
Residenzbildungsprozess des 15. und  
16. Jahrhunderts*

*Hallische Beiträge zur Geschichte des Mittelalters und  
der Frühen Neuzeit, Band 4*

2009. 699 S. – 20 s/w- und 15 Farbbabb.  
170 x 240 mm, Festeinband, € 79,80  
ISBN 978-3-05-004068-4

Matthias Meinhardt untersucht die Entwicklung Dresdens zur Residenzstadt an der Wende vom Mittelalter zur Neuzeit. Der stadthistorische Transformationsprozess wird zunächst anhand der Topographie systematisch ausgeleuchtet. Dabei werden insbesondere Wandlungen geschildert, die aus der Residenzfunktion resultierten, aber auch Stadtbereiche markiert, die von der Residenzbildung nahezu unbeeinflusst blieben. Auf diese Weise werden die Struktur des Stadtraumes, der heute nur noch wenig mit seiner Gestalt des 15. und 16. Jahrhunderts gemein hat, rekonstruiert und städtische Gestaltungsbereiche und Gestaltungsformen von höfischen abgegrenzt.

Die Analyse der Dresdner Bevölkerung bedient sich drei unterschiedlicher Perspektiven. Zunächst werden die Bevölkerung insgesamt sowie große Teilgruppen in den Blick genommen. So wird nach der Entwicklung der Bevölkerungszahl sowie dem Umfang, der Herkunft und der beruflichen Struktur der Neubürger gefragt. Analysen der Vermögensstrukturen schließen sich hieran an. Enger wird der Fokus mit der Untersuchung der wichtigsten sozialen und ökonomischen Gruppen gestellt. Die politischen Eliten von Stadt und Hof geraten dabei ebenso in den Blick wie die Innungen und verschiedene Bereiche der Hofhaltung und Territorialverwaltung. Auch werden soziale Sondergruppen, wie der in Dresden ansässige Adel und die Geistlichkeit, näher betrachtet. Schließlich werden ausgewählte, besonders gut überlieferte Biographien genauer untersucht. Soziale, ökonomische und politische Konflikte werden ebenso sichtbar wie die insbesondere im 16. Jahrhundert an Dynamik gewinnende Integration von Bürgerschaft und Hof.

Der Band schließt mit einem Abbildungs- und umfangreichen farbigen Kartenteil.
